# 1 **GenFam: A web application and database for gene family-based** 2 **classification and functional enrichment analysis**

3  
4 Renesh Bedre<sup>1</sup> and Kranthi Mandadi<sup>1,2\*</sup>

5  
6 <sup>1</sup>Texas A&M AgriLife Research & Extension Center, Weslaco, TX, USA

7 <sup>2</sup>Department of Plant Pathology & Microbiology, Texas A&M University, College Station, TX,  
8 USA

9  
10 \*Correspondence:

11 Kranthi Mandadi

12 [kkmandadi@tamu.edu](mailto:kkmandadi@tamu.edu)

## 13 14 **ABSTRACT**

15  
16 Genome-scale studies using high-throughput sequencing (HTS) technologies generate substantial  
17 lists of differentially expressed genes under different experimental conditions. These gene lists  
18 need to be further mined to narrow down biologically relevant genes and associated functions in  
19 order to guide downstream functional genetic analyses. A popular approach is to determine  
20 statistically overrepresented genes in a user-defined list through enrichment analysis tools, which  
21 rely on functional annotations of genes based on Gene Ontology (GO) terms. Here, we propose a  
22 new approach, GenFam, which allows classification and enrichment of genes based on their gene  
23 family, thus simplifying identification of candidate gene families and associated genes that may  
24 be relevant to the query. GenFam and its integrated database comprises of three-hundred and  
25 eighty-four unique gene families and supports gene family classification and enrichment  
26 analyses for sixty plant genomes. Four comparative case studies with plant species belonging to  
27 different clades and families were performed using GenFam which demonstrated its robustness  
28 and comprehensiveness over preexisting functional enrichment tools. To make it readily  
29 accessible for plant biologists, GenFam is available as a web-based application where users can  
30 input gene IDs and export enrichment results in both tabular and graphical formats. Users can  
31 also customize analysis parameters by choosing from the various statistical enrichment tests and  
32 multiple testing correction methods. Additionally, the web-based application, source code and  
33 database are freely available to use and download. Website:

34 <http://mandadilab.webfactional.com/home/>. Source code and database:

35 <http://mandadilab.webfactional.com/home/dload/> .

## 36 37 38 **KEYWORDS**

39  
40 Gene family enrichment analysis, gene ontologies, database, software, statistics, data integration  
41  
42  
43  
44  
45  
46

## 47 INTRODUCTION

48  
49 In recent years, genome-wide analyses using high-throughput sequencing (HTS) technologies,  
50 have become indispensable to life science research. Generating large-scale datasets has become  
51 relatively straightforward, as opposed to efficiently interpreting the data to gain intuition into  
52 biologically significant mechanisms. Data mining tools that determine, predict, and enrich  
53 putative functions among HTS datasets are highly valuable for such genomic analyses (Backes et  
54 al., 2007). For instance, RNA-sequencing (RNA-seq) analysis is a high-throughput approach to  
55 study transcriptome regulation by determining transcript-level changes in multiple cell- or tissue-  
56 types, or among varying experimental conditions (e.g., unstressed vs. stressed). In a typical  
57 RNA-seq experiment, the analysis yields hundreds, if not thousands, of genes that are  
58 differentially expressed among the experimental conditions. Uncovering enriched biological  
59 pathways among these gene lists is a valuable starting step for downstream functional genetic  
60 analyses.

61  
62 The Gene Ontology (GO)-term based enrichment tools (e.g., BinGO (Maere et al., 2005),  
63 Blast2GO (Conesa et al., 2005), AgriGO (Du et al., 2010), PlantGSEA (Yi et al., 2013)) are  
64 widely used by researchers to infer the biological mechanisms of genes identified in HTS  
65 experiments (Mandadi and Scholthof, 2012; Chen et al., 2013; Bedre et al., 2015; Mandadi and  
66 Scholthof, 2015; Bedre et al., 2016; Li et al., 2017; Bedre et al., 2019). These tools identify  
67 overrepresented GO terms associated within a user-defined list of genes by mapping them to the  
68 background genome annotations and calculating statistical probability of the enrichment relative  
69 to the background. The enrichment tools can classify genes into GO categories or pathways  
70 related to biological process, molecular function and cellular locations (Goffard and Weiller,  
71 2007; Du et al., 2010). The GO-enrichment and the resultant hierarchy are very useful to  
72 understand the complex biological processes that are being enriched. However, information on  
73 specific biological attributes of a gene, such as the gene family (a group of homologous genes  
74 with common evolutionary origin and biological functions) level information, are hard to glean  
75 from GO-enrichment alone (Ashburner et al., 2000; Lee et al., 2005). For instance, enrichment of  
76 a transcription factor will fetch GO terms for “regulation of transcription (GO:0006355)” or  
77 “DNA binding (GO:0003700)” or “response to stress (GO:0006950)” but does not identify  
78 which transcription factor family genes (e.g., WRKY, bZIP) being enriched. Having this  
79 information, allows users to readily interpret large-scale datasets effectively and select favorite  
80 gene families for further functional studies. While providing the information for functional  
81 studies, gene families also could reveal the accurate gene annotation information that could not  
82 be easily determined by BLAST-based tools alone. Further, comparative gene family size  
83 analysis can certainly be informative and valuable approach to explore the biologically relevant  
84 functions related to genome architecture and adaptation or speciation of various plant species  
85 (Guo, 2013).

86  
87 With the availability of complete genomes and sequence data, identification, and analysis of  
88 specific gene families among plant species has become necessary. In this study, we present a  
89 unique approach to perform classification and enrichment of genes to identify overrepresented  
90 gene families (GenFam) in a user-defined query list. We suggest that GenFam is a valuable  
91 addition to a plant biologists toolkit to analyze large-scale HTS datasets. By determining  
92 overrepresented gene families in a user-defined gene list, rather than GO terms or hierarchy

93 alone, GenFam empowers users to readily interpret information of gene families (e.g. WRKY,  
94 bZIP) in their queries, and move forward to selecting favorite overrepresented genes (or families)  
95 for downstream studies and interpretation. GenFam is also freely accessible to users on the  
96 world-wide web, as a user-friendly, graphical-user interface.

97

## 98 **MATERIALS AND METHODS**

99

### 100 **Background database**

101

102 GenFam currently supports the analysis of sixty plant genomes. GenFam classifies genes into  
103 384 representative and unique gene families, which to the best of our knowledge the largest  
104 collection, based on the well-annotated *Arabidopsis thaliana* (Berardini et al., 2015) and rice  
105 (*Oryza sativa*) (Kawahara et al., 2013) genomes, literature search, and Pfam protein families  
106 database (El-Gebali et al., 2019). We have identified and used Pfam common conserved domains  
107 and domain organization among the homologous gene sequences to assign the gene families.  
108 These highly conserved domains define protein functions and classifies protein-coding genes  
109 into gene families. The conserved signature protein domains have the ability to detect the  
110 divergent or distantly related homologs which would be prohibitive with sequence based  
111 similarity analysis tools [e.g. BLAST (Altschul et al., 1997)]. Therefore, domain-based search  
112 method would identify more genes belonging to gene families than BLAST-based homology  
113 search.

114

115 To identify and classify gene families in plants, we have leveraged the publicly available  
116 genomic resources at Phytozome (v12) database. The protein sequences of sixty plant genomes  
117 were used to identify conserved protein domains to assign families to known and unclassified or  
118 novel genes. The respective protein domains were predicted by HMMER (v3.1b2) using a  
119 protein family hidden Markov model (HMM) profiles (Pfam release 32.0) (El-Gebali et al.,  
120 2019). We have established rules to classify and assign the genes to gene families based on the  
121 presence of signature conserved protein domains and have provided in **Supplementary Table**  
122 **S1**. This approach allowed us to maximize classification including orphan genes with missing  
123 annotations, genes with incorrect annotations, and novel genes present among the respective  
124 genome databases. Lastly, the background databases were curated to remove redundancy and  
125 duplication of gene members among families. In summary, we were able to integrate 384  
126 representative gene families and corresponding (on an average ~41%) genes from sixty plant  
127 genomes into our database (**Supplementary Table S2**). This is the most comprehensive and  
128 largest collection of gene families spanning sixty plant species, when compared to other existing  
129 databases. For instance, the recently published gene family database in poplar (GFDP) has  
130 classified 6551 poplar genes into 145 gene families derived from Arabidopsis genome (Wang et  
131 al., 2018). PlantTFDB (v4.0) and PlnTFDB (v3.0) has classified the genes into 58 and 84  
132 transcription factor gene families (Perez-Rodriguez et al., 2010; Jin et al., 2017). Similarly,  
133 another database and analysis toolkit, PlantGSEA, supports the gene family analysis for 13 plant  
134 species which mostly imports gene families from well-annotated genomes such as rice (118 gene  
135 families) and maize (81 gene families) (Yi et al., 2013).

136

137 All the gene family data was formatted using the PostgreSQL database to perform classification  
138 and enrichment analysis using various statistical enrichment methods. The GenFam database

139 with complete protein domain annotation and gene family classification can be downloaded from  
140 the GenFam website (<http://mandadilab.webfactional.com/home/dload/>). Detailed statistics for  
141 the number of genes assigned to each gene family and the total number of background genes are  
142 provided in **Supplementary Table S2**.

143

## 144 **Statistical enrichment methods**

145

146 GenFam performs three main functions: i) Annotation ii) classification, and iii) enrichment of a  
147 user-defined gene list to provide gene family-level attributes. The enrichment is based on the  
148 singular enrichment analysis (SEA) method, which computes enrichment of a user-defined list of  
149 genes with a precomputed background dataset (Huang da et al., 2009). GenFam accepts different  
150 types of gene IDs for the analysis. For example, for rice, it accepts gene (e.g.,  
151 LOC\_Os01g06882) and transcript (e.g., LOC\_Os01g06882.1) IDs from parent database such as  
152 the Rice Genome Annotation Project (<http://rice.plantbiology.msu.edu/>). Additionally, GenFam  
153 also accepts Phytozome PAC IDs for a given gene (e.g., 24120792 for LOC\_Os01g06882),  
154 which provides additional flexibility in performing the analysis. To determine an acceptable ID,  
155 the user can run the “check allowed ID type for each species” function on the GenFam analysis  
156 page (<http://mandadilab.webfactional.com/family/>). Once the appropriate gene IDs are provided,  
157 GenFam classifies and identifies specific gene families and members that are overrepresented in  
158 the input gene list.

159

160 Even though there is no defined standard for choosing a reference background, it is ideal to  
161 select a background that will increase coverage (or intersection) with an input gene list, as well  
162 as that enhances specificity of the enrichment analysis (Huang da et al., 2009). GenFam utilizes  
163 the number of total genes categorized/annotated into gene families in each plant species as a  
164 reference background, rather than using the whole genome. This feature greatly improves the  
165 specificity of the enrichment analysis by implementing statistically stringent criteria. For  
166 instance, for case study 1, if enrichment analysis was performed with the whole genome as  
167 background, it would result in 35 enriched gene families with much lower P-values, when  
168 compared to using the current GenFam background (29 enriched gene families) (**Supplementary**  
169 **Table S3**).

170

171 GenFam can employ standard statistical tests such as the Fisher exact, Chi-Square ( $\chi^2$ ), Binomial  
172 distribution and Hypergeometric tests for enrichment, along with multiple testing corrections to  
173 control a false discovery. We recommend using Fisher exact, Chi-square ( $\chi^2$ ) and  
174 Hypergeometric tests for smaller datasets (<1000) (McDonald, 2009), and Binomial distribution  
175 for larger datasets (Khatri and Draghici, 2005; Zheng and Wang, 2008). Furthermore, the Chi-  
176 Square ( $\chi^2$ ) test would be appropriate when the user defined gene list has less overlap with the  
177 background dataset. As a default test, GenFam performs the Fisher exact test, which relies on the  
178 proportion of observed data, instead of a value of a test statistic to estimate the probability of  
179 genes of interest corresponding to a specific category.

180

181 To address the false positives resulting from multiple comparisons especially when the input  
182 gene list is large (>1000), GenFam subsequently employs false discovery correction methods  
183 including the Benjamini-Hochberg (Benjamini and Hochberg, 1995), Bonferroni (Bonferroni,

184 1936) and Bonferroni-Holm (Holm, 1979). The various statistical tests and false discovery  
185 correction methods can be customized by the user as appropriate.

186

## 187 **Output summary**

188

189 A snapshot of the analysis page and workflow is shown in **Figure 1**. Users have the option to  
190 either use the default settings or select desired statistical parameters. The analysis page also  
191 guides the users to select gene IDs that are acceptable in GenFam (**Figure 1**). Users are directed  
192 to the results after analysis is completed (**Figure 1**). The results of GenFam analysis are  
193 displayed as summary table (HTML) and graphical chart plotted using the  $-\log_{10}(\text{P-Value})$   
194 scores. Higher the  $-\log_{10}(\text{P-Value})$  value, greater the confidence in enrichment of the gene family  
195 (**Figure 2**). The enriched and non-enriched gene family results can also be downloaded as  
196 tabular files, with further details of associated P-value and FDR statistics, gene family size, gene  
197 IDs and GO terms.

198

199 Along with enrichment results for the gene families, GenFam also provides information related  
200 to GO terms in biological process, molecular function and cellular component categories  
201 associated with the enriched gene families. In addition to GO terms, GenFam also provides the  
202 gene family size and gene IDs associated with each gene family. These results can be  
203 downloaded as a tabular file (“Enriched Families”) or as a graphical figure of the enriched  
204 families (“Get Figures”). If users only want to retrieve the classification of genes, GenFam  
205 parses another tabular file containing the information of all annotated gene families (“All  
206 Families”).

207

## 208 **Web server implementation**

209

210 The GenFam web server is implemented using Python 3 (<https://www.python.org/>), Django  
211 1.11.7 (<https://www.djangoproject.com/>) and PostgreSQL (<https://www.postgresql.org/>)  
212 database. All the codes for data formatting and statistical analysis are implemented using Python  
213 scripting language. Python is a fully-fledged programming language which offers well developed  
214 packages for statistical analysis, graphics and integration with web apps. Therefore, we have  
215 chosen Python over other languages such as R for development of GenFam. The high-level  
216 Python web framework was constructed using Django. The Python web framework was hosted  
217 using WebFaction (<https://www.webfaction.com/>). The web-based templates were designed  
218 using Bootstrap, HTML, and CSS. The GenFam is compatible with all major browsers including  
219 Internet Explorer, Microsoft Edge, Google Chrome, Mozilla and Safari. All the precomputed  
220 plant gene family background databases were built using advanced PostgreSQL database. The  
221 analyzed data was visualized using the matplotlib (Droettboom et al., 2016) Python plotting  
222 library.

223

## 224 **RESULTS AND DISCUSSION**

225

### 226 **Case studies and analysis**

227

228 To demonstrate the utility of GenFam, we performed four case studies using transcriptome  
229 datasets related to plants from different clades and families (cotton, tomato, soybean and rice)

230 (Bedre et al., 2015; Dametto et al., 2015; Zeng et al., 2017; Cui et al., 2018). We have previously  
231 identified 662 differentially expressed genes in cotton (*Gossypium raimondii*, family Malvaceae)  
232 infected with *Aspergillus flavus* (Bedre et al., 2015). For the first case study, we used GenFam to  
233 determine the enriched gene families among these differentially expressed genes, using the  
234 options of Fisher exact test for statistical enrichment, and the Benjamini-Hochberg (Benjamini  
235 and Hochberg, 1995) method to control false discovery rate (FDR). Among the 662 genes, 514  
236 genes were annotated and classified into gene families, resulting in ~78% intersection/coverage  
237 with the GenFam database. The GenFam enrichment analysis revealed overrepresented gene  
238 families such as expansins, kinases, reactive oxygen species (ROS) scavenging enzymes, defense  
239 related genes, heat shock proteins and transcription factors—genes that we have hypothesized to  
240 mediate cell-wall modifications, antioxidant activity and defense signaling in response to *A.*  
241 *flavus* infection (Bedre et al., 2015). Additionally, GenFam also identified new enriched gene  
242 families such as bHLH, GH3, glycosyltransferases and thaumatin that were not reported or  
243 identified (**Figures 1 and 2; Supplementary Table S3**). In the second case study, we analyzed  
244 758 genes which were up-regulated in a cold-tolerant rice (*Oryza sativa*, family Poaceae)  
245 (Dametto et al., 2015). Among the 758 genes, 460 genes were annotated and classified into gene  
246 families by GenFam, resulting in ~61% intersection/coverage with the GenFam database.  
247 GenFam was able to successfully determine enriched gene families related to aquaporins,  
248 glutathione S-transferases (GST), transporters, lipid metabolism, transcription factors as well as  
249 gene families involved in cell wall-related mechanisms (**Supplementary Table S4**)—genes that  
250 were hypothesized by Dametto *et al.* (2015) (Dametto et al., 2015) to play a role in the rice cold  
251 stress response. Additionally, GenFam also identified new enriched gene families such as  
252 aldehyde dehydrogenase (ADH), kinesins, glycosyltransferases, tubulin, phenylalanine ammonia  
253 lyase (PAL) and thaumatin that were not reported or identified (**Supplementary Table S4**).  
254 Next, we analyzed the differentially regulated genes from tomato (*Solanum lycopersicum*, family  
255 Solanaceae) (Cui et al., 2018) and soybean (*Glycine max*, family Fabaceae) (Zeng et al., 2017)  
256 using GenFam (**Supplementary Table S5 and S6**). We obtained ~65% and ~59%  
257 intersection/coverage with the GenFam database for tomato and soybean respectively. The  
258 GenFam results in both these studies revealed enrichment of several gene families that were  
259 overrepresented and reported by Cui *et al.* (2018) (Cui et al., 2018) and Zeng *et al.* (2017) (Zeng  
260 et al., 2017) (**Supplementary Table S5 and S6**). Additionally, GenFam also identified new  
261 enriched gene families such as aquaporins, VQ, tify, GST, and PAL in tomato, and BET,  
262 Dirigent, Expansins, Asparagine synthase (ASNS), and Carbonic anhydrase (CA) in soybean that  
263 were not reported or identified (**Supplementary Table S5 and S6**). The detailed statistics of  
264 enriched gene families for these case studies are provided in **Supplementary Table S3, S4, S5**  
265 **and S6**.

## 266 **GenFam advantages and comparison with preexisting enrichment tools**

268 To the best of our knowledge, there is only one existing enrichment tool that comes close to the  
269 GenFam approach, i.e., PlantGSEA (Yi et al., 2013), which also allows users to enrich gene lists  
270 using gene family attributes. Hence, we performed a comparative analysis of GenFam and  
271 PlantGSEA with a dataset from cotton (662 genes)(Bedre et al., 2015) and employing identical  
272 parameters (Fisher exact test and Benjamini-Hochberg method) for enrichment. GenFam  
273 enriched gene families belonging to cell-wall modifying genes, ROS scavenging genes,  
274 transcription factors, lipid metabolism, and stress responsive gene families, both new and

275 previously shown to be biologically-relevant during *A. flavus* infection of cotton (Bedre et al.,  
276 2015), while PlantGSEA missed several of these categories (**Supplementary Table S3 and S7**).  
277 Upon further examination, we found that several gene family categories such as the ABC  
278 transporters, expansins, and glutathione-S-transferase were absent in the PlantGSEA *G.*  
279 *raimondii* background database. Moreover, PlantGSEA supports only thirteen plant genomes  
280 with several redundant and overlapping genes and gene families, which could impact the  
281 accuracy of the enrichment analysis. For instance, in the *A. thaliana* genome there are 37  
282 annotated “C2-C2 Dof” transcription factors. PlantGSEA categorized 36 out of the 37 genes into  
283 a “C2-C2 Dof” family, but also into an additional “Dof” family leading to redundant gene family  
284 categories. GenFam avoids such discrepancies by curation and filtering redundant categories.

285  
286 Taken together, we suggest that GenFam is a comprehensive and robust gene family  
287 classification and enrichment program over prevailing tools, with several advantages: i) GenFam  
288 is a dedicated and comprehensive platform for gene family-level classification, annotation and  
289 enrichment analysis and supports sixty plant genomes including model and non-model plant  
290 species. ii) GenFam background dataset was constructed from well-annotated gene families of *A.*  
291 *thaliana* and rice genomes, literature search, and as well as a systematic HMM profile search for  
292 signature conserved protein domain analysis using the Pfam database. This inclusive strategy  
293 enabled us to categorize most of the genes into families, including those which may lack a  
294 defined annotation in their corresponding genome database or could be novel genes. As a result,  
295 GenFam database is by far the largest collection of gene families (384 families). In contrast,  
296 existing databases such as PlantGSEA and GFDP only relies on annotations defined by other  
297 databases such as TAIR and MSU annotations and/or other transcription factor databases (Yi et  
298 al., 2013; Wang et al., 2018). The lack of additional analysis of protein domains perhaps explains  
299 the poor representation of gene families in PlantGSEA and GFDP databases. iii) GenFam  
300 background dataset was curated to remove redundancy and overlapping genes into different gene  
301 families, that enhances the accuracy of the analysis. iv) In contrast to PlantGSEA, GenFam uses  
302 the annotated gene families as reference background instead of the whole genome. This feature  
303 ensures decreasing enrichment bias and increasing the accuracy of the analysis (Huang da et al.,  
304 2009). v) GenFam accepts multiple input IDs including, gene IDs, transcript IDs and PAC IDs,  
305 however PlantGSEA and GFDP are restricted to using only gene IDs. vi) GenFam can be solely  
306 used for gene family annotation and classification regardless of enrichment analysis if a user is  
307 only interested in annotating genes.

308

## 309 **CONCLUSION**

310

311 Data mining of big datasets (e.g., HTS data) is a very important step, and approaches that can  
312 systematically mine biologically relevant information from big data are highly desirable. GO  
313 term-based enrichment analyses, although very useful to gain insight about the complex  
314 biological information, does not reveal specific gene family level attributes or overrepresented  
315 gene families. GenFam can be used as a complementary or alternative approach to GO-based  
316 enrichment to interpret biologically relevant information in big datasets by classifying and  
317 enriching gene families within a user-defined gene list. This specific information on which gene  
318 families are overrepresented allows users to readily identify favorite genes for downstream  
319 inquiries. Along with enriching gene families, GenFam can be useful to annotate the large list of  
320 genes generated from HTS experiments irrespective of enrichment analysis. In conclusion, we

321 suggest that GenFam would be a valuable and powerful tool for plant biologists utilizing  
322 genomics strategies to study plant biology and functional genetics.

323

## 324 AVAILABILITY AND REQUIREMENTS

325

326 **Project name:** GenFam

327 **Project home page:** <http://mandadilab.webfactional.com/home/>

328 **Operating system(s):** Platform independent

329 **Programming language:** Python 3, Django 1.11.7

330 **License:** CC BY-NC-ND 4.0

331 **Any restrictions to use by non-academics:** License needed

332

## 333 CONFLICT OF INTERESTS

334

335 The authors declare no competing financial interests.

336

## 337 AUTHOR CONTRIBUTIONS

338

339 RB conceived the project, developed the database/webserver, performed the case studies and  
340 prepared the manuscript. KKM supervised the study, data analysis and interpretation. Both  
341 authors have read, reviewed and approved the manuscript.

342

## 343 ACKNOWLEDGEMENTS

344

345 We thank Sonia Irigoyen (Texas A&M AgriLife Research) for review and comments during the  
346 preparation of this manuscript. All experiments were conducted following the guidelines and  
347 appropriate permissions of the Institutional Biosafety Committee of Texas A&M University.  
348 This work was supported by funds from Texas A&M AgriLife Research Insect-vectorized Disease  
349 Seed Grant to KKM.

350

## 351 REFERENCES

352 Altschul, S.F., Madden, T.L., Schaffer, A.A., Zhang, J.H., Zhang, Z., Miller, W., et al. (1997).

353 Gapped BLAST and PSI-BLAST: a new generation of protein database search programs.

354 *Nucleic Acids Research* 25(17), 3389-3402. doi: Doi 10.1093/Nar/25.17.3389.

355 Ashburner, M., Ball, C.A., Blake, J.A., Botstein, D., Butler, H., Cherry, J.M., et al. (2000). Gene

356 ontology: tool for the unification of biology. The Gene Ontology Consortium. *Nat Genet* 25(1),

357 25-29. doi: 10.1038/75556.

358 Backes, C., Keller, A., Kuentzer, J., Kneissl, B., Comtesse, N., Elnakady, Y.A., et al. (2007).

359 GeneTrail--advanced gene set enrichment analysis. *Nucleic Acids Res* 35(Web Server issue),

360 W186-192. doi: 10.1093/nar/gkm323.

361 Bedre, R., Irigoyen, S., Schaker, P.D.C., Monteiro-Vitorello, C.B., Da Silva, J.A., and Mandadi,

362 K.K. (2019). Genome-wide alternative splicing landscapes modulated by biotrophic sugarcane

363 smut pathogen. *Sci Rep* 9(1), 8876. doi: 10.1038/s41598-019-45184-1.



- 364 Bedre, R., Mangu, V.R., Srivastava, S., Sanchez, L.E., and Baisakh, N. (2016). Transcriptome  
365 analysis of smooth cordgrass (*Spartina alterniflora* Loisel), a monocot halophyte, reveals  
366 candidate genes involved in its adaptation to salinity. *BMC Genomics* 17(1), 657. doi:  
367 10.1186/s12864-016-3017-3.
- 368 Bedre, R., Rajasekaran, K., Mangu, V.R., Timm, L.E.S., Bhatnagar, D., and Baisakh, N. (2015).  
369 Genome-wide transcriptome analysis of cotton (*Gossypium hirsutum* L.) identifies candidate  
370 gene signatures in response to aflatoxin producing fungus *Aspergillus flavus*. *Plos One* 10(9),  
371 e0138025. doi: ARTN e0138025  
372 10.1371/journal.pone.0138025.
- 373 Benjamini, Y., and Hochberg, Y. (1995). Controlling the false discovery rate - a practical and  
374 powerful approach to multiple testing. *Journal of the Royal Statistical Society Series B-*  
375 *Methodological* 57(1), 289-300.
- 376 Berardini, T.Z., Reiser, L., Li, D., Mezheritsky, Y., Muller, R., Strait, E., et al. (2015). The  
377 Arabidopsis information resource: making and mining the “gold standard” annotated reference  
378 plant genome. *genesis* 53(8), 474-485.
- 379 Bonferroni, C.E. (1936). *Teoria statistica delle classi e calcolo delle probabilita*. Libreria  
380 internazionale Seeber.
- 381 Chen, E.Y., Tan, C.M., Kou, Y., Duan, Q., Wang, Z., Meirelles, G.V., et al. (2013). Enrichr:  
382 interactive and collaborative HTML5 gene list enrichment analysis tool. *BMC Bioinformatics* 14,  
383 128. doi: 10.1186/1471-2105-14-128.
- 384 Conesa, A., Gotz, S., Garcia-Gomez, J.M., Terol, J., Talon, M., and Robles, M. (2005).  
385 Blast2GO: a universal tool for annotation, visualization and analysis in functional genomics  
386 research. *Bioinformatics* 21(18), 3674-3676. doi: 10.1093/bioinformatics/bti610.
- 387 Cui, J., Xu, P., Meng, J., Li, J., Jiang, N., and Luan, Y. (2018). Transcriptome signatures of  
388 tomato leaf induced by *Phytophthora infestans* and functional identification of transcription  
389 factor SpWRKY3. *Theor Appl Genet* 131(4), 787-800. doi: 10.1007/s00122-017-3035-9.
- 390 Dametto, A., Sperotto, R.A., Adamski, J.M., Blasi, E.A., Cargnelutti, D., de Oliveira, L.F., et al.  
391 (2015). Cold tolerance in rice germinating seeds revealed by deep RNAseq analysis of  
392 contrasting indica genotypes. *Plant Sci* 238, 1-12. doi: 10.1016/j.plantsci.2015.05.009.
- 393 Droettboom, M., Hunter, J., Caswell, T., Firing, E., Nielsen, J., Elson, P., et al. (2016).  
394 "matplotlib: matplotlib v1. 5.1". doi).
- 395 Du, Z., Zhou, X., Ling, Y., Zhang, Z.H., and Su, Z. (2010). agriGO: a GO analysis toolkit for the  
396 agricultural community. *Nucleic Acids Research* 38, W64-W70. doi: 10.1093/nar/gkq310.
- 397 El-Gebali, S., Mistry, J., Bateman, A., Eddy, S.R., Luciani, A., Potter, S.C., et al. (2019). The  
398 Pfam protein families database in 2019. *Nucleic Acids Res* 47(D1), D427-D432. doi:  
399 10.1093/nar/gky995.
- 400 Goffard, N., and Weiller, G. (2007). PathExpress: a web-based tool to identify relevant pathways  
401 in gene expression data. *Nucleic Acids Research* 35, W176-W181. doi: 10.1093/nar/gkm261.
- 402 Guo, Y.L. (2013). Gene family evolution in green plants with emphasis on the origination and  
403 evolution of Arabidopsis thaliana genes. *Plant J* 73(6), 941-951. doi: 10.1111/tpj.12089.
- 404 Holm, S. (1979). A simple sequentially rejective multiple test procedure. *Scandinavian journal*  
405 *of statistics* 6(2), 65-70.
- 406 Huang da, W., Sherman, B.T., and Lempicki, R.A. (2009). Bioinformatics enrichment tools:  
407 paths toward the comprehensive functional analysis of large gene lists. *Nucleic Acids Res* 37(1),  
408 1-13. doi: 10.1093/nar/gkn923.

409 Jin, J., Tian, F., Yang, D.C., Meng, Y.Q., Kong, L., Luo, J., et al. (2017). PlantTFDB 4.0: toward  
410 a central hub for transcription factors and regulatory interactions in plants. *Nucleic Acids Res*  
411 45(D1), D1040-D1045. doi: 10.1093/nar/gkw982.  
412 Kawahara, Y., de la Bastide, M., Hamilton, J.P., Kanamori, H., McCombie, W.R., Ouyang, S., et  
413 al. (2013). Improvement of the *Oryza sativa* Nipponbare reference genome using next generation  
414 sequence and optical map data. *Rice* 6. doi: Artn 4  
415 10.1186/1939-8433-6-4.  
416 Khatri, P., and Draghici, S. (2005). Ontological analysis of gene expression data: current tools,  
417 limitations, and open problems. *Bioinformatics* 21(18), 3587-3595. doi:  
418 10.1093/bioinformatics/bti565.  
419 Lee, J.S., Katari, G., and Sachidanandam, R. (2005). GObar: a gene ontology based analysis and  
420 visualization tool for gene sets. *BMC Bioinformatics* 6, 189. doi: 10.1186/1471-2105-6-189.  
421 Li, Y., Dai, C., Hu, C., Liu, Z., and Kang, C. (2017). Global identification of alternative splicing  
422 via comparative analysis of SMRT- and Illumina-based RNA-seq in strawberry. *Plant J* 90(1),  
423 164-176. doi: 10.1111/tpj.13462.  
424 Maere, S., Heymans, K., and Kuiper, M. (2005). BiNGO: a Cytoscape plugin to assess  
425 overrepresentation of Gene Ontology categories in Biological Networks. *Bioinformatics* 21(16),  
426 3448-3449. doi: Doi 10.1093/Bioinformatics/Bti551.  
427 Mandadi, K.K., and Scholthof, K.-B.G. (2015). Genome-wide analysis of alternative splicing  
428 landscapes modulated during plant-virus interactions in *Brachypodium distachyon*. *Plant Cell* 27,  
429 71-85. doi: 10.1105/tpc.114.133991.  
430 Mandadi, K.K., and Scholthof, K.B. (2012). Characterization of a viral synergism in the monocot  
431 *Brachypodium distachyon* reveals distinctly altered host molecular processes associated with  
432 disease. *Plant Physiol* 160(3), 1432-1452. doi: 10.1104/pp.112.204362.  
433 McDonald, J.H. (2009). *Handbook of biological statistics*. Sparky House Publishing Baltimore,  
434 MD.  
435 Perez-Rodriguez, P., Riano-Pachon, D.M., Correa, L.G.G., Rensing, S.A., Kersten, B., and  
436 Mueller-Roeber, B. (2010). PlnTFDB: updated content and new features of the plant  
437 transcription factor database. *Nucleic Acids Research* 38, D822-D827. doi: 10.1093/nar/gkp805.  
438 Wang, H., Yan, H., Liu, H., Liu, R., Chen, J., and Xiang, Y. (2018). GFDP: the gene family  
439 database in poplar. *Database (Oxford)* 2018. doi: 10.1093/database/bay107.  
440 Yi, X., Du, Z., and Su, Z. (2013). PlantGSEA: a gene set enrichment analysis toolkit for plant  
441 community. *Nucleic Acids Res* 41(Web Server issue), W98-103. doi: 10.1093/nar/gkt281.  
442 Zeng, W., Sun, Z., Cai, Z., Chen, H., Lai, Z., Yang, S., et al. (2017). Comparative transcriptome  
443 analysis of soybean response to bean pyralid larvae. *BMC Genomics* 18(1), 871. doi:  
444 10.1186/s12864-017-4256-7.  
445 Zheng, Q., and Wang, X.J. (2008). GOEAST: a web-based software toolkit for Gene Ontology  
446 enrichment analysis. *Nucleic Acids Res* 36(Web Server issue), W358-363. doi:  
447 10.1093/nar/gkn276.

## 448 449 **FIGURE LEGENDS**

450  
451 **Figure 1.** GenFam workflow. The list of input gene IDs for respective plant species provided by  
452 the user are analyzed for enrichment analysis using various statistical tests. The output of the  
453 analysis can be viewed and/or downloaded as a table and/or graphical summary. The results page  
454 has multiple options to visualize or download data for both enriched and non-enriched categories

455 (all gene families). The detailed output data from case studies are provided in **Supplementary**  
456 **Tables S3, S4, S5 and S6.**

457

458 **Figure 2.** Graphical summary of GenFam enrichment analysis of a cotton case study. Results  
459 are plotted as bar chart using the  $-\log_{10}(\text{P-Value})$  scores. Higher the  $-\log_{10}(\text{P-Value})$  value,  
460 greater the confidence in enrichment of the gene family.

461

## 462 **SUPPLEMENTARY MATERIAL**

463

464 **Supplementary Table S1:** The classification of gene families and assignment of conserved  
465 protein domain to each gene family

466 **Supplementary Table S2:** GenFam database statistics for total number of genes classified into  
467 gene families and background number of genes in each plant species

468 **Supplementary Table S3:** List of the differentially regulated genes and analysis output of the  
469 cotton case study

470 **Supplementary Table S4:** List of the differentially regulated genes and analysis output of the  
471 rice case study

472 **Supplementary Table S5:** List of the differentially regulated genes and analysis output of the  
473 tomato case study

474 **Supplementary Table S6:** List of the differentially regulated genes and analysis output of the  
475 soybean case study

476 **Supplementary Table S7:** PlantGSEA result for gene family enrichment analysis using *G.*  
477 *raimondii* dataset used in GenFam case study.

## Input gene IDs

GenFam Analysis Documentation Cont

Gene Family Enrichment Analysis

### Sequence IDs:

Gorai.002G203600  
Gorai.006G078900  
Gorai.006G230600  
Gorai.010G058900  
Gorai.011G137500  
Gorai.008G272100  
Gorai.005G258100

## Analysis

Gene family background database

Pre-quality check analysis

Statistical analysis

Fisher exact test

Hypergeometric distribution

Binomial distribution

Chi-square test

P-value correction

## Output

GenFam Analysis Documentation Downloads

Success! Data Analysis Completed (Process ID: 173209701903)

Number of gene annotated = 518 (Total query IDs = 652)

Enriched Gene Families All Gene Families Get Figures

Download file with GO annotation View in browser

Over enriched gene family (P-value <0.05)

| Gene family                                           | Short name | P-value           | FDR               |
|-------------------------------------------------------|------------|-------------------|-------------------|
| MYB gene family                                       | MYB        | 2.15254796082e-30 | 1.29152877649e-28 |
| WRKY gene family                                      | WRKY       | 3.25947269779e-18 | 4.94242126776e-17 |
| Basic helix-loop-helix (bHLH) gene family gene family | bHLH       | 2.88952348045e-17 | 3.46742817654e-16 |
| AP2/EREBP gene family                                 | AP2/EREBP  | 0.00605692289573  | 0.0157536534401   |

### Table summary

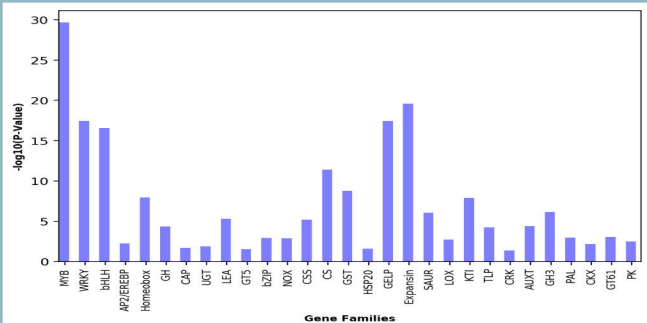

### Graphical summary

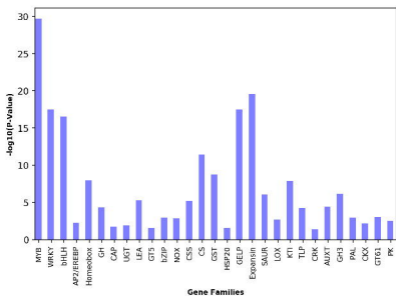

Source: https://www.biorxiv.org/content/early/2019/08/28/272187.full.pdf
